# Supplementary material for: Structure and magnetic properties of ionic compound (Cp*2Cr+)·(FeIPc−)·(C6H4Cl2)4containing negatively charged iron phthalocyanine
Source: Royal Society of Chemistry journal article supplement (doi:10.1039/c1nj20858f), 2011-11-17
Supplement: c1nj20858f.pdf [file c1nj20858f.pdf]

## Supporting information.

*Crystal structure of 1* at 150 K: Crystal data of **1**: C<sub>76</sub>H<sub>62</sub>Cl<sub>8</sub>CrFeN<sub>8</sub>, M<sub>r</sub> = 1478.79, triclinic, P  $\bar{1}$ ,  $a = 10.5331(12)$ ,  $b = 12.3100(11)$ ,  $c = 14.9616(13)$  Å,  $\alpha = 98.283(7)$ ,  $\beta = 110.587(9)$ ,  $\gamma = 106.472(9)^\circ$ ,  $V = 1676.1(3)$  Å<sup>3</sup>,  $Z = 1$ ,  $\rho_{\text{calcd}} = 1.465$  g·cm<sup>-3</sup>,  $T = 150(2)$  K, data/parameters/restrains 17996/ 522/ 455,  $R_1 = 0.0974$ ,  $wR_2 = 0.2338$ , G.O.F = 1.071 The intensity data for **1** were collected on an Oxford diffractions "Gemini-R" CCD diffractometer with graphite monochromated MoK $\alpha$  radiation at low temperatures using an Oxford Instrument Cryojet system. Raw data reduction to F<sup>2</sup> was carried out using CrysAlisPro, Oxford Diffraction Ltd. The structures were solved by direct method and refined by the full-matrix least-squares method against F<sup>2</sup> using SHELX-97.<sup>1</sup> Non-hydrogen atoms were refined in the anisotropic approximation. Positions of hydrogen atoms were calculated geometrically. Subsequently, the positions of H atoms were refined by the "riding" model with U<sub>iso</sub> = 1.2U<sub>eq</sub> of the connected non-hydrogen atom or as ideal CH<sub>3</sub> groups with U<sub>iso</sub> = 1.5U<sub>eq</sub>. To keep the structure and thermal parameters of the disordered units close to real one we use SAME and DELU instruction in SHELXL what provides large enough number of restrains.

## References.

- (1) SHELX97, Sheldrick, G.M. University of Göttingen, Germany, **1997**.

**Table S1.** IR-spectra of starting compounds and complex **1**.

| Components                                      | Cp* <sub>2</sub> Cr | Fe <sup>II</sup> Pc | C <sub>6</sub> H <sub>4</sub> Cl <sub>2</sub> | <b>1</b> |
|-------------------------------------------------|---------------------|---------------------|-----------------------------------------------|----------|
| <b>Cp*<sub>2</sub>Cr</b>                        | 418w                |                     |                                               | 436w     |
|                                                 | 549w                |                     |                                               | 548w     |
|                                                 | 1021s               |                     |                                               | 1025w    |
|                                                 | 1060w               |                     |                                               | -        |
|                                                 | 1375s               |                     |                                               | 1380m    |
|                                                 | 1413w               |                     |                                               | -        |
|                                                 | 1448w               |                     |                                               | -        |
| <b>Fe<sup>II</sup>Pc</b>                        |                     | 434w                |                                               |          |
|                                                 |                     | 515w                |                                               | 440w     |
|                                                 |                     | 572w                |                                               | 518w     |
|                                                 |                     | 688w                |                                               | 572w     |
|                                                 |                     | 733s                |                                               | 688w     |
|                                                 |                     | 757s                |                                               | 728s     |
|                                                 |                     | 780m                |                                               | 754s*    |
|                                                 |                     | 820w                |                                               | 770w     |
|                                                 |                     | 877w                |                                               | -        |
|                                                 |                     | 893w                |                                               | 873w     |
|                                                 |                     | 909w                |                                               | 893w     |
|                                                 |                     | 1002w               |                                               | 911w     |
|                                                 |                     | 1083s               |                                               | 1001w    |
|                                                 |                     | 1118s               |                                               | 1090m    |
|                                                 |                     | 1163m               |                                               | 1119s*   |
|                                                 |                     | 1288m               |                                               | 1165m    |
|                                                 |                     | 1331s               |                                               | 1289w    |
|                                                 |                     | 1422s               |                                               | 1331w    |
|                                                 |                     | 1466w               |                                               | 1423s    |
|                                                 |                     | 1495w               |                                               | 1482w    |
|                                                 |                     | 1512w               |                                               | 1506m    |
| <b>C<sub>6</sub>H<sub>4</sub>Cl<sub>2</sub></b> |                     |                     | 657w                                          | 658w     |
|                                                 |                     |                     | 748s                                          | 754s*    |
|                                                 |                     |                     | 1030m                                         | 1034m    |
|                                                 |                     |                     | 1122m                                         | 1119s*   |
|                                                 |                     |                     | 1453m                                         | 1455m    |

## Peculiarities of crystal structure.

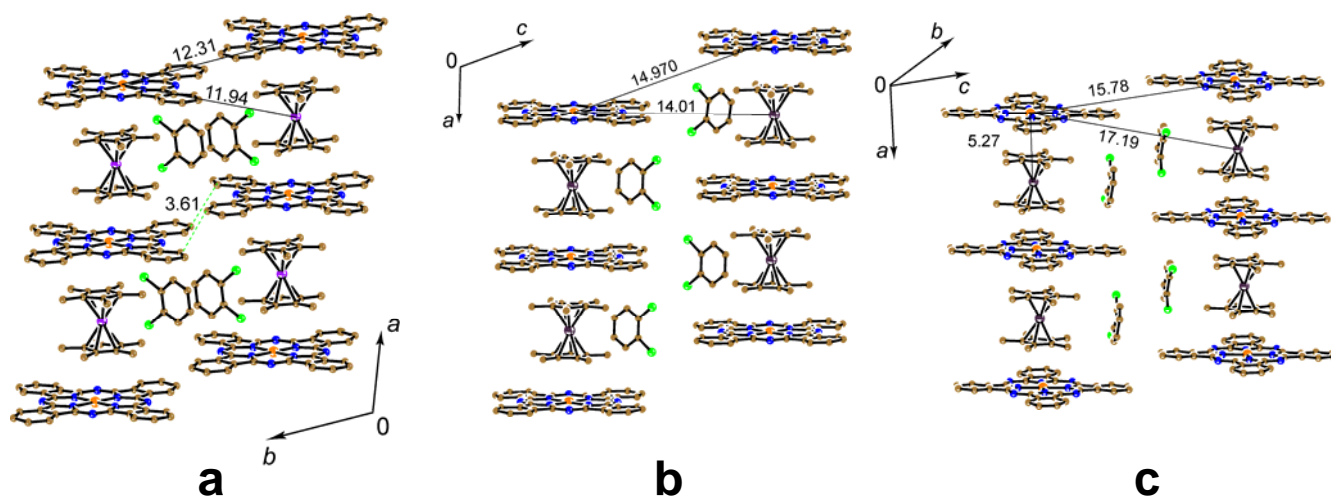

**Figure 1S.** View of crystal structure of **1**. Two chains from the  $\text{Cp}^*_2\text{Cr}^+$  and  $\text{Fe}^{\text{I}}\text{Pc}^-$  ions are shown in the direction parallel to the  $c$ -axis (a); the  $b$ -axis (b) and to the diagonal for the  $bc$  plane (c).

## Magnetic measurements

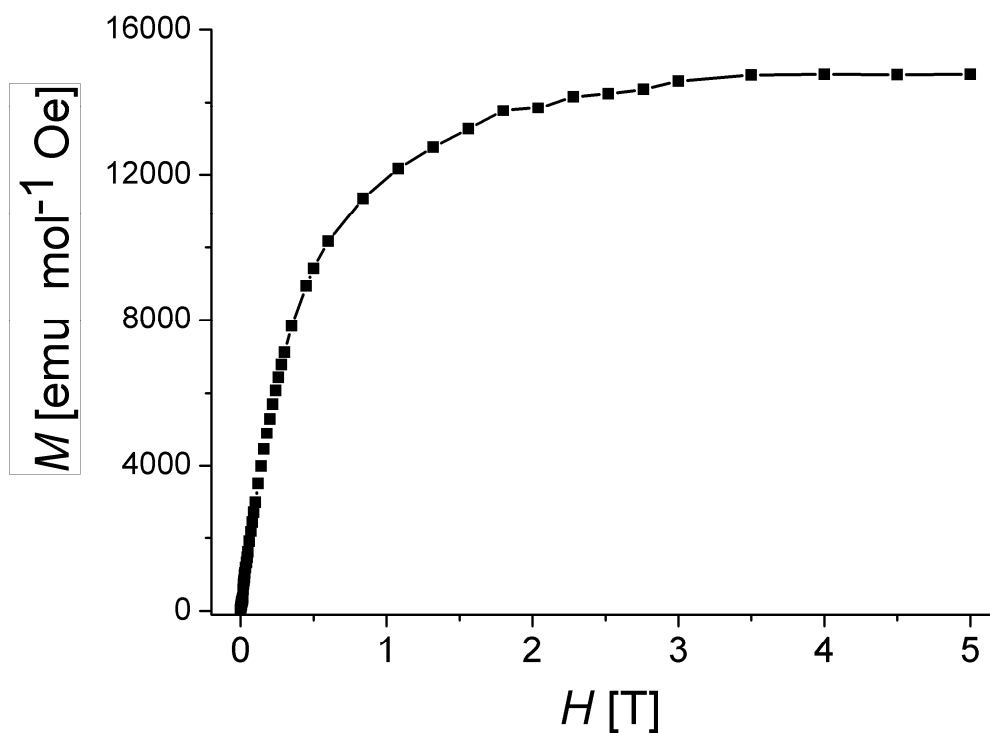

**Figure 2S.** The dependence of isothermal magnetization,  $M(H)$  vs applied magnetic field ( $H$ ) at 2K.
